# Supplementary material for: Analysis of the Chemical, Antioxidant, and Anti-Inflammatory Properties of Pink Pepper (Schinus molle L.)
Source: MDPI journal article supplement (doi:10.3390/antiox10071062), 2021-06-30

Supplementary Figure S1. Chromatograms for fructose, glucose, sucrose, and maltose in the pink and black peppers

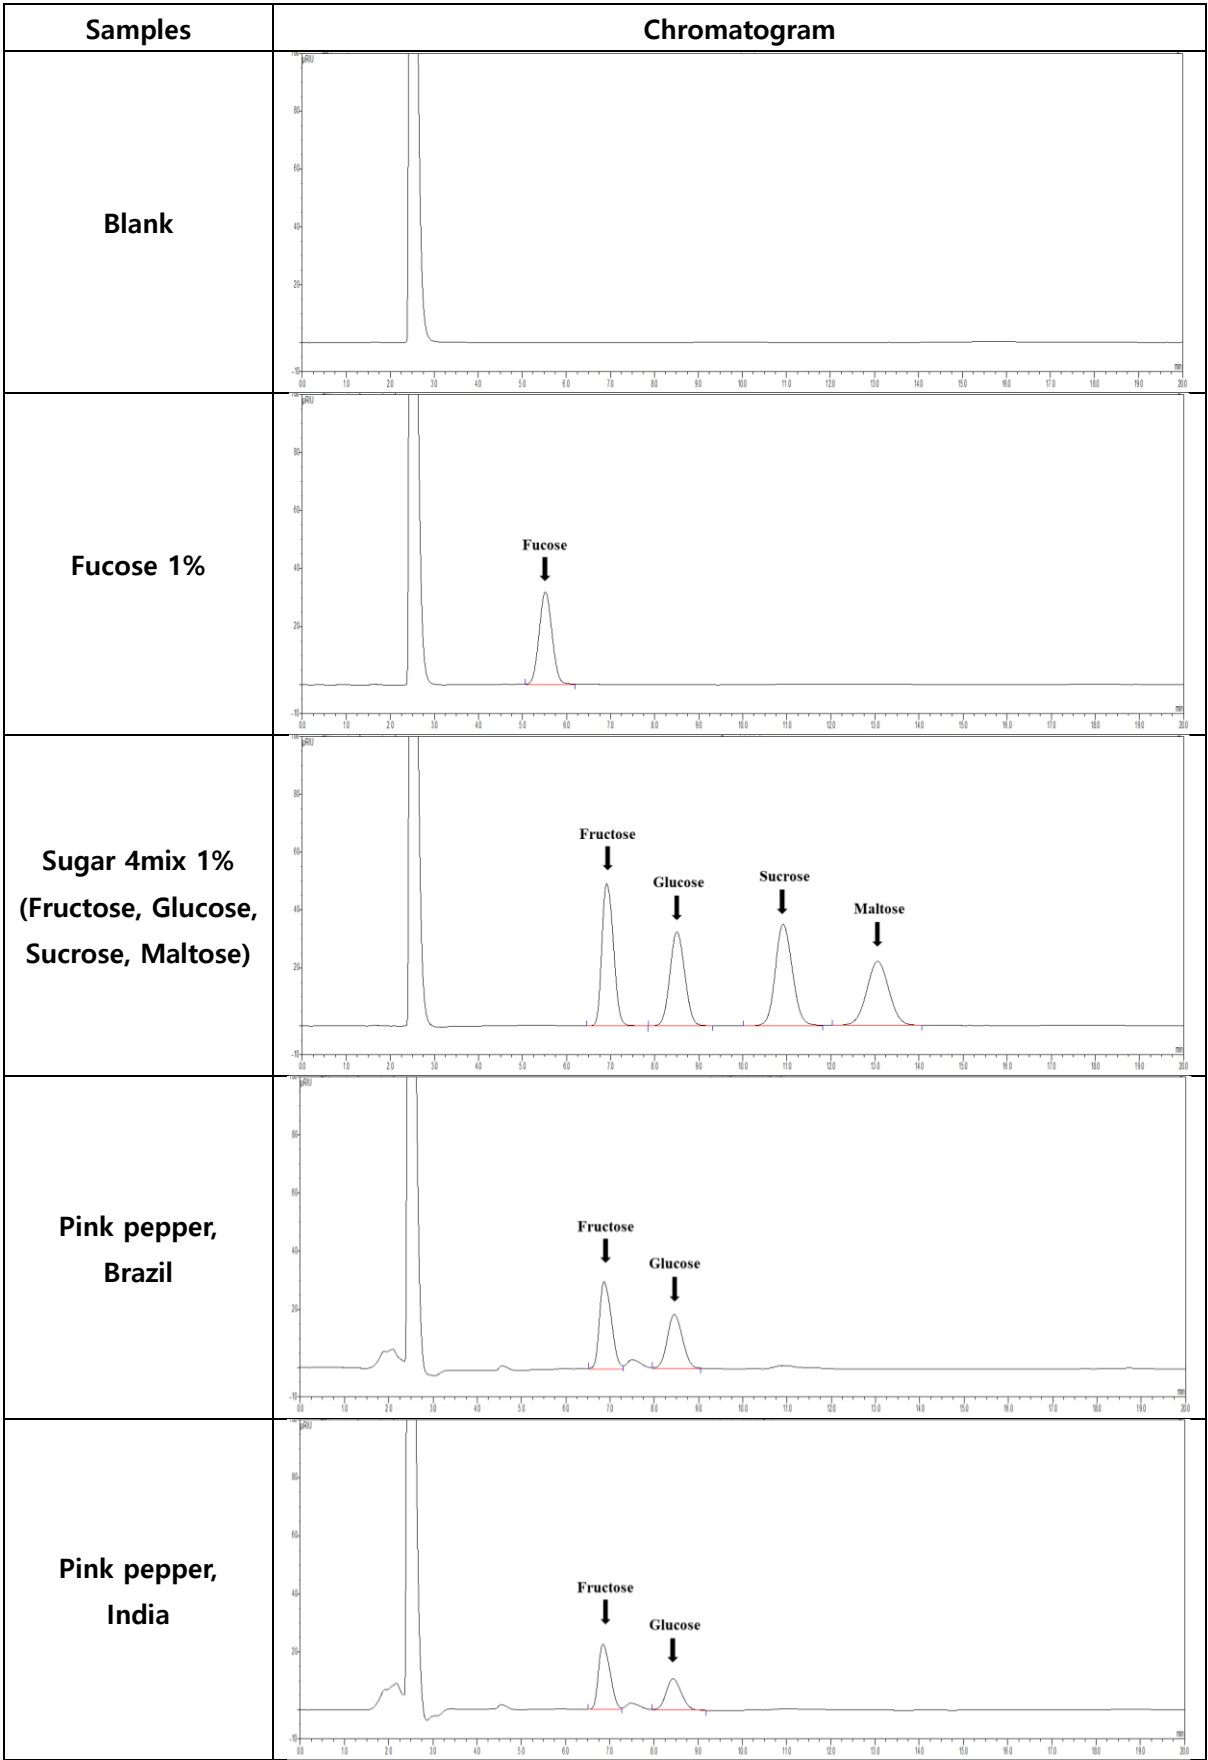

**Pink pepper,  
Sri Lanka**

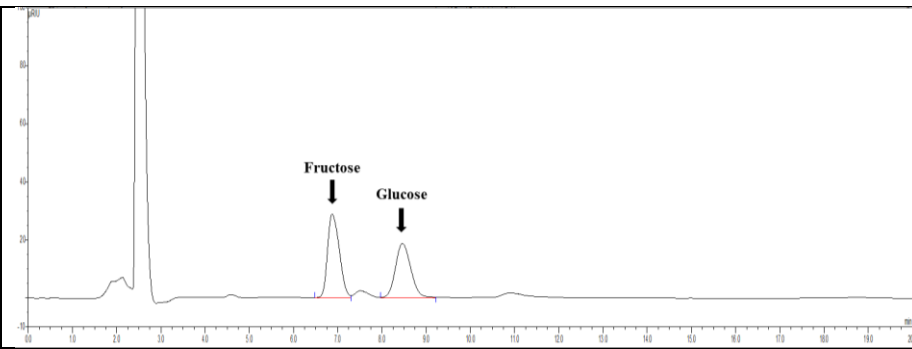

**Black pepper,  
Vietnam**

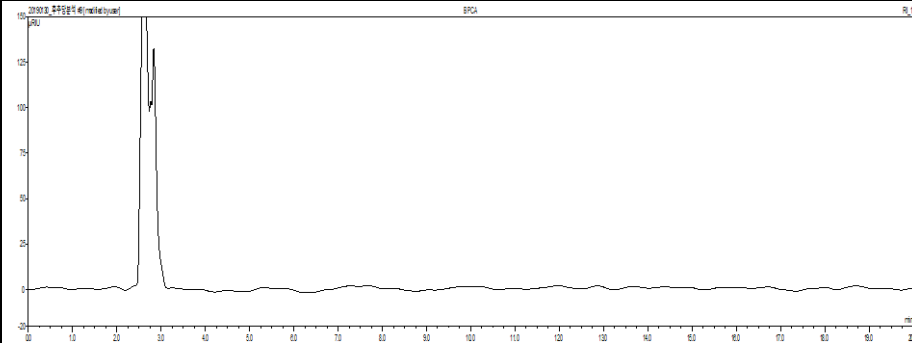

Supplement: s1 [file s1]
